# Supplementary material
Source: PubMed Central journal article supplement (PMC3408548)
Supplement: NIHMS369467-supplement-01.pdf [file NIHMS369467-supplement-01.pdf]

## Synaptic Potentiation is Critical for Rapid Antidepressant Response to Ketamine in Treatment-Resistant Major Depression

### Supplemental Information

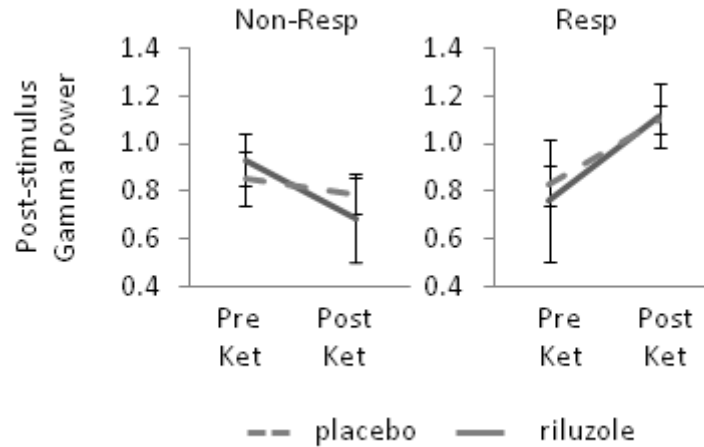

**Figure S1.** A single dose of riluzole (50 mg) did not affect stimulus-evoked SS ctx responses. Increased stimulus-evoked SS ctx gamma-band responses in responders (Resp;  $n = 9$ ) is independent of whether riluzole ( $n = 6$ ) or placebo ( $n = 3$ ) was administered after the ketamine infusion ( $\approx 1$  h before post-ketamine magnetoencephalography recordings). Non-responders (Non-Resp;  $n = 11$ ) showed, on average, a reduction in stimulus-evoked SS ctx responses irrespective of whether they received riluzole ( $n = 6$ ) or placebo ( $n = 5$ ). Error bars represent standard errors of the means. Ket, ketamine; SS ctx, somatosensory cortical.
